# Supplementary material for: Critical role for Sec22b-dependent antigen cross-presentation in antitumor immunity
Source: PubMed Central journal article supplement — J Exp Med. 2017 Aug 7;214(8):2231–41. doi: 10.1084/jem.20170229 (PMC5551575; doi:10.1084/jem.20170229), 2017-08-07
Supplement: JEM_20170229_sm.pdf [file JEM_20170229_sm.pdf]

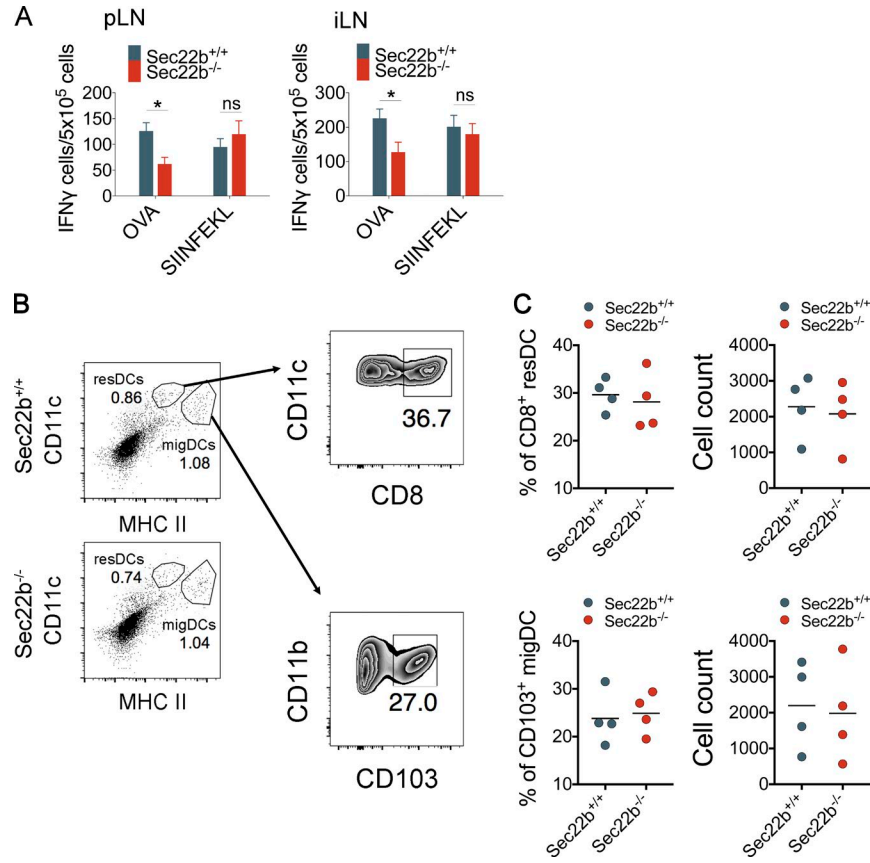

Figure S2. **Immunization of Sec22b<sup>+/+</sup> and Sec22b<sup>-/-</sup> mice to analyze endogenous responses.** (A) Total cells from popliteal (pLN; left) and inguinal (iLN; right) lymph nodes from Sec22b<sup>+/+</sup> and Sec22b<sup>-/-</sup> mice immunized with IFA-CpG-SIINFEKL were restimulated ex vivo with SIINFEKL or OVA. The percentage of OVA-specific T cells producing IFN- $\gamma$  per  $5 \times 10^5$  blood cells was determined by ELISPOT analysis. The means and SEM are shown. \*, 0.01 < P < 0.05. (B) Phenotypic analysis of resident (res) and migratory (mig) DCs in lymph nodes. Gating strategy to identify the putative cross-presenting subsets CD8<sup>+</sup> and CD103<sup>+</sup> DCs in resDCs and migDCs, respectively. (C) Percentages (left) and cell count (right) of CD8<sup>+</sup> resDCs (top) and CD103<sup>+</sup> migDCs (bottom). Shown are the pooled data of four independent experiments. Results were analyzed by two-way ANOVA with Bonferroni's multiple comparisons test for statistical significance. The means are shown.

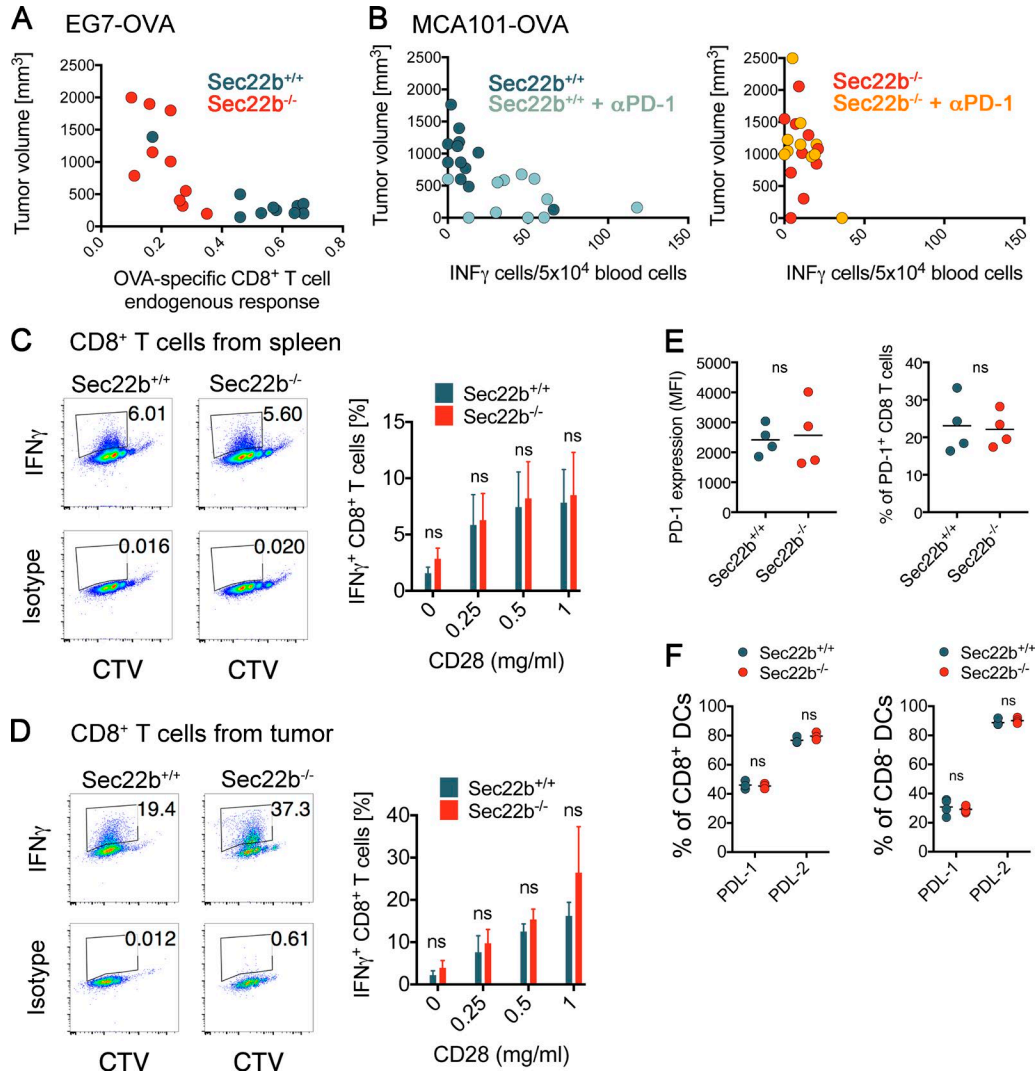

Figure S3. **Correlative analysis of tumor growth and T cell responses.** (A) CD8<sup>+</sup> T cell response (measured by OVA-specific tetramers) versus EG7 tumor growth (the day of sacrifice). (B, left) CD8<sup>+</sup> T cell response (quantified by IFN- $\gamma$ -producing cells after restimulation with MHC class I-restricted peptide) versus MCA101-OVA tumor growth in Sec22b<sup>+/+</sup> mice, without or with anti-PD-1 treatment. (Right) CD8<sup>+</sup> T cell response (quantified by IFN- $\gamma$ -producing cells after restimulation with MHC class I-restricted peptide) versus MCA101-OVA tumor growth in Sec22b<sup>-/-</sup> mice, without or with anti-PD-1 treatment. (C) Intracellular staining for IFN- $\gamma$  production in CD8<sup>+</sup> T cells from spleens of mice injected with MCA-OVA tumor and treated with anti-PD-1, after 72 h of proliferation in a CD3-coated plate with increasing concentrations of CD28. Example of gating strategy (left) and pooled data (right) of four mice. Shown are the means and SEM. Results were analyzed by two-way ANOVA with Bonferroni's multiple comparisons test for statistical significance. (D) Intracellular staining for IFN- $\gamma$  production in CD8<sup>+</sup> T cells from tumors of mice injected with MCA-OVA tumor and treated with anti-PD-1, after 72 h of proliferation in a CD3-coated plate with increasing concentrations of CD28. Example of gating strategy (left) and pooled data (right) of four mice. Shown are the means and SEM. Results were analyzed by two-way ANOVA with Bonferroni's multiple comparisons test for statistical significance. (E) PD-1 expression in CD8<sup>+</sup> T cells from tumors of Sec22b<sup>+/+</sup> and Sec22b<sup>-/-</sup> mice injected with MCA-OVA tumor and treated with anti-PD-1. (F) PD-L1 and PD-L2 expression in splenic DCs from Sec22b<sup>+/+</sup> and Sec22b<sup>-/-</sup> mice.
